# Supplementary material for: dz2 orbital character of polyhedra in complex solid-state transition-metal compounds
Source: Royal Society of Chemistry journal article supplement (doi:10.1039/c9dt04091a), 2019-12-10
Supplement: c9dt04091a1.pdf [file c9dt04091a1.pdf]

## Electronic Supplementary Information

# $d_z^2$ Orbital character of polyhedra in complex solid-state transition-metal compounds

Isao Ohkubo<sup>\*,a,b,c</sup> and Takao Mori<sup>a,b</sup>

<sup>a</sup>Center for Functional Sensor & Actuator (CFSN), Research Center for Functional Materials, National Institute for Materials Science (NIMS), 1-1 Namiki, Tsukuba, Ibaraki 305-0044, Japan

<sup>b</sup>International Center for Materials Nanoarchitectonics (MANA), National Institute for Materials Science (NIMS), 1-1 Namiki, Tsukuba, Ibaraki 305-0044, Japan

<sup>c</sup>Center for Materials Research by Information Integration (CMI<sup>2</sup>), Research and Services Division of Materials Data and Integrated System (MaDIS), National Institute for Materials Science (NIMS), 1-1 Namiki, Tsukuba, Ibaraki 305-0044, Japan

\*Corresponding author, e-mail address: OHKUBO.Isao@nims.go.jp

| Contents                                                                                                                      | Page  |
|-------------------------------------------------------------------------------------------------------------------------------|-------|
| 1. Description of calculations                                                                                                | S2    |
| 2. Electronic structure of 2H-type hexagonal perovskite SrTiS <sub>3</sub> composed of face-sharing octahedra                 | S3–S4 |
| 3. Electronic structure of $\alpha$ -NaFeO <sub>2</sub> -type SrHfN <sub>2</sub> consisting of edge-sharing octahedral layers | S4    |
| 4. Electronic structure of LiWN <sub>2</sub> consisting of edge-sharing trigonal prismatic layers                             | S5–S6 |
| 5. Supplementary references                                                                                                   | S6    |

### List of Figures

1. Figure S1 (page S2) Brillouin zones for 4H-type hexagonal perovskite BaTiO<sub>3</sub> and 2H-type hexagonal perovskites BaTiS<sub>3</sub>, 2H-SrTiS<sub>3</sub>, LiWN<sub>2</sub>, and LiMoN<sub>2</sub>
2. Figure S2 (page S3) Electronic band structure and orbital characters for a lowest conduction band of 2H-type hexagonal perovskite SrTiS<sub>3</sub>
3. Figure S3 (page S4) Density of states (DOS) of 2H-type hexagonal perovskite SrTiS<sub>3</sub>
4. Figure S4 (page S4) Density of states (DOS) of  $\alpha$ -NaFeO<sub>2</sub>-type SrHfN<sub>2</sub>
5. Figure S5 (page S5) Electronic band structure and orbital characters for the lowest conduction band of LiWN<sub>2</sub>
6. Figure S6 (page S6) Density of states (DOS) of LiWN<sub>2</sub>

## 1. Description of calculations

The electronic-structure calculations were performed by using the L/APW+lo method, as implemented in the WIEN2k code.<sup>S1</sup> The generalized gradient approximation-Perdew-Burke-Ernzerhof functional (GGA-PBE)<sup>S2,S3</sup> and the modified Becke-Johnson exchange potential (mBJ) were used.<sup>S4,S5</sup> A GGA-PBE+*U* approach was also adopted, where *U* is the effective on-site Coulomb interaction correction. All calculations were performed by using experimental structural coordinates and lattice constants taken from powder neutron and X-ray diffraction measurements. The 4H-type hexagonal perovskite BaTiO<sub>3</sub> crystallizes with a *P6<sub>3</sub>/mmc* structure (space group No. 194) with Ba atoms situated at the (0, 0, 1/4) and the (1/3, 2/3, 0.096715) sites, Ti atoms at the (0, 0, 0) and the (1/3, 2/3, 0.8463314) sites, and O atoms at the (0.51856, 0.0370, 1/4) and the (0.83496, 0.6698, 0.08022) sites.<sup>S6</sup> The lattice parameters are *a* = 5.72387 Å and *c* = 13.96497 Å. The 2H-type hexagonal perovskites BaTiS<sub>3</sub> and SrTiS<sub>3</sub> also crystallize with a *P6<sub>3</sub>/mmc* structure (space group No. 194), with Ba (Sr) atoms situated at the (1/3, 2/3, 1/4) site, Ti atoms at the (0, 0, 0) site, and S at the (0.16551, 0.33212, 1/4) site for BaTiS<sub>3</sub> or the (0.166, 0.332, 1/4) site for SrTiS<sub>3</sub>.<sup>S7,S8</sup> The lattice constants are *a* = 6.756 Å, *c* = 5.798 Å for BaTiS<sub>3</sub> and *a* = 6.59 Å, *c* = 5.708 Å for SrTiS<sub>3</sub>.

To calculate the electronic structures of α-NaFeO<sub>2</sub>-type SrMN<sub>2</sub> (M = Zr, Hf) and LiMoN<sub>2</sub> by using the WIEN2k code, the lattice constants of the hexagonal system and the atomic positions of the rhombohedral system were used. α-NaFeO<sub>2</sub>-type SrMN<sub>2</sub> (M = Zr, Hf) crystallizes in the *R-3m* structure (space group No. 166), with the Sr atoms situated at the (1/2, 1/2, 1/2) site, M-type atoms at the (0, 0, 0) site, and N at the (*z*, *z*, *z*) site (*z* = 0.23502 for SrZrN<sub>2</sub>, *z* = 0.23463 for SrHfN<sub>2</sub>).<sup>S9</sup> The hexagonal lattice constants for these calculations are *a* = 3.373 Å, *c* = 17.676 Å for SrZrN<sub>2</sub>, and *a* = 3.345 Å, *c* = 17.678 Å for SrHfN<sub>2</sub>. LiMoN<sub>2</sub> crystallizes in the *R3* structure (space group No. 146), with the Li atoms situated at the (0.829018, 0.829018, 0.829018) site, Mo atoms at the (0, 0, 0) site, and N at the (0.25204, 0.25204, 0.25204) site and the (0.41414, 0.41414, 0.41414) site.<sup>S10</sup> The lattice constants are *a* = 2.86723 Å, *c* = 15.813 Å. LiWN<sub>2</sub> crystallizes in the *P6<sub>3</sub>/mmc* structure (space group No. 194), with the Li atoms situated at the (0, 0, 0) site, W atoms at the (1/3, 2/3, 1/4) site, and N at the (1/3, 2/3, 0.65253) site.<sup>S11</sup> The lattice constants are *a* = 2.881 Å, *c* = 10.346 Å. The parameter *R<sub>mt</sub>K<sub>max</sub>*, where *R<sub>mt</sub>* is the smallest muffin-tin radius (in atomic units) and *K<sub>max</sub>* is the plane wave cutoff, controls the size of the basis, which was set to a high value of 7.0 for all materials. The values of *R<sub>mt</sub>* for the atomic spheres were 2.5 (Ba), 1.93 (Ti), 1.75 (O) for 4H-BaTiO<sub>3</sub>; 2.5 (Ba), 2.45 (Ti), 2.11 (S) for 2H-BaTiS<sub>3</sub>; 2.5 (Sr), 2.39 (Ti), 2.06 (S) for 2H-SrTiS<sub>3</sub>; 2.26 (Sr), 2.08 (Zr), 1.79 (N) for SrZrN<sub>2</sub>; 2.25 (Sr), 2.11 (Hf), 1.73 (N) for SrHfN<sub>2</sub>; 1.82 (Li), 2.11 (Mo), 1.82 (N) for LiMoN<sub>2</sub>; and 1.83 (Li), 2.17 (W), 1.78 (N) for LiWN<sub>2</sub>. 100 *k*-points in the Brillouin zones were used in calculating the electronic structures. The Brillouin zones for the electronic band structures of 4H-type hexagonal perovskite BaTiO<sub>3</sub>, 2H-type hexagonal perovskite BaTiS<sub>3</sub>, 2H-SrTiS<sub>3</sub>, LiWN<sub>2</sub>, and LiMoN<sub>2</sub> are shown in Figure S1.

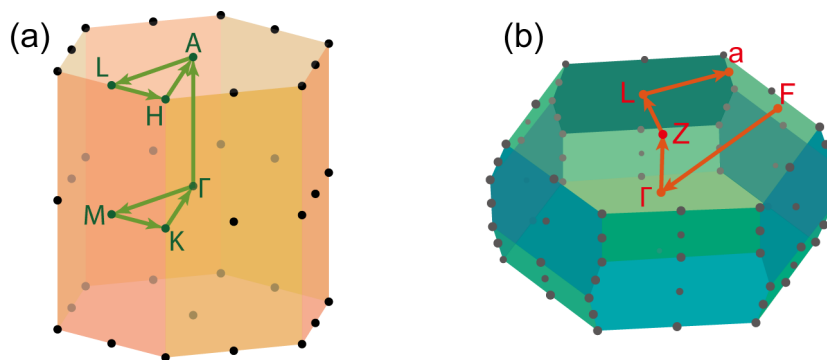

Figure S1. Brillouin zones for the electronic band structures of (a) 4H-type hexagonal perovskite BaTiO<sub>3</sub>, 2H-type hexagonal perovskite BaTiS<sub>3</sub>, 2H-SrTiS<sub>3</sub>, and LiWN<sub>2</sub> and (b) of LiMoN<sub>2</sub>.

## 2. Electronic structure of 2H-type hexagonal perovskite SrTiS<sub>3</sub> composed of face-sharing octahedra

Figure S2 shows the electronic band structure and the orbital characters for the lowest conduction band of the 2H-type hexagonal perovskite SrTiS<sub>3</sub>, which consists of face-sharing TiS<sub>6</sub> octahedral blocks. The results of electronic calculations for 2H-SrTiS<sub>3</sub> using the GGA-PBE functional and the mBJ exchange potential do not show energy-band gaps if the on-site Coulomb interaction is not considered. Energy-band gaps in 2H-SrTiS<sub>3</sub> are observed in the electronic structures calculated by the GGA-PBE+*U* method if the effective Coulombic interaction  $U_{\text{eff}} > 8$  eV: an effective on-site  $U_{\text{eff}}$  was therefore taken into account for the Ti site. The calculated energy-band gap (direct) of 2H-SrTiS<sub>3</sub> at the  $\Gamma$ -point is 0.18 eV ( $U_{\text{eff}} = 9$  eV). The energy-band gaps vary depending on the value of  $U_{\text{eff}}$ . Figure S3 shows the density of states (DOS) in 2H-SrTiS<sub>3</sub>. The lowest conduction band and the highest valence band in 2H-SrTiS<sub>3</sub> have mainly Ti 3d and S 3p orbital characters, respectively. Orbital characters for the lowest conduction band are shown in Figures S2b. Ti 3d<sub>z<sup>2</sup></sub> (a<sub>1g</sub>) orbital character predominates in the lowest conduction band, except for the L $\bar{H}$  directions. In the L–H directions of the electronic band structures, the Ti 3d<sub>x<sup>2</sup>-y<sup>2</sup></sub> + 3d<sub>xy</sub> orbitals are dominant.

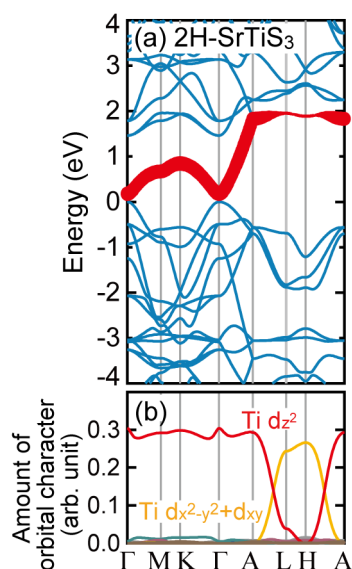

Figure S2. (a) Electronic band structure and (b) orbital characters for the lowest conduction band in the 2H-hexagonal perovskite SrTiS<sub>3</sub>. The amount of Ti 3d<sub>z<sup>2</sup></sub> orbital character is shown by the width of the lines in the lowest conduction band. In Figure S2b, all s orbitals, p orbitals ( $p_z$ ,  $p_x + p_y$  for Sr and Ti,  $p_x$ ,  $p_y$ ,  $p_z$  for S), and d orbitals ( $d_z^2$ ,  $d_{x^2-y^2} + d_{xy}$ ,  $d_{xz} + d_{yz}$  for Sr and Ti) are plotted. The electronic band structure was calculated by the GGA-PBE+*U* method ( $U_{\text{eff}} = 9$  eV).

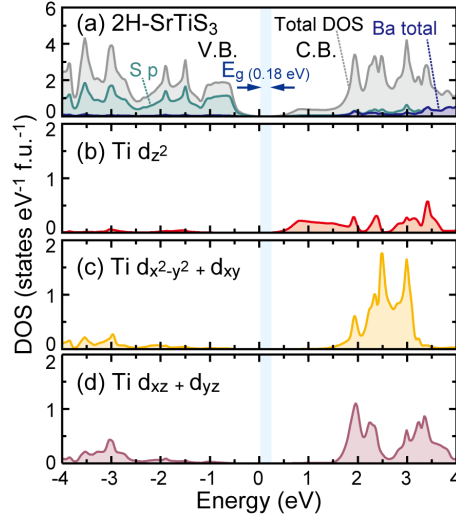

Figure S3. Total and partial density of states (DOS) of d orbitals in the 2H-hexagonal perovskite SrTiS<sub>3</sub>. (a) Total DOS and partial DOS of Sr and S 3p orbitals, (b)  $d_z^2$ , (c)  $d_{x^2-y^2} + d_{xy}$ , (d)  $d_{xz} + d_{yz}$  orbitals. The DOSs were calculated by the GGA-PBE+*U* method ( $U_{\text{eff}} = 9$  eV).

### 3. Electronic structure of $\alpha$ -NaFeO<sub>2</sub>-type SrHfN<sub>2</sub> consisting of edge-sharing octahedral layers

Figure S4 shows the density of states (DOS) in the  $\alpha$ -NaFeO<sub>2</sub>-type  $d^0$ -layered complex metal nitride SrHfN<sub>2</sub>, which consists of edge-sharing HfN<sub>6</sub> octahedral layers. The DOSs of SrHfN<sub>2</sub> were calculated by using the mBJ exchange potential. The main contributors to the valence bands and the conduction bands are N 2p orbitals and Hf 5d orbitals, respectively. As with the other  $\alpha$ -NaFeO<sub>2</sub>-type  $d^0$ -layered complex metal nitrides SrZrN<sub>2</sub>, NaNbN<sub>2</sub>, and NaTa<sub>2</sub>N<sub>2</sub>, the Hf 5 $d_{z^2}$  orbital characters predominate at the bottom of the conduction band (F-point).<sup>S12,S13</sup>

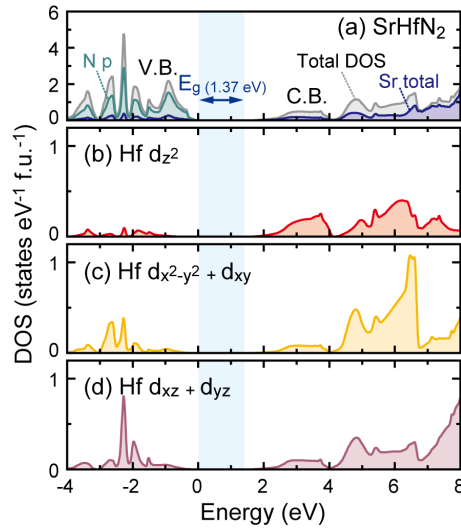

Figure S4. Total and partial density of states (DOS) of d orbitals in  $\alpha$ -NaFeO<sub>2</sub>-type SrHfN<sub>2</sub>. (a) Total DOS and partial DOS of Sr and N 2p orbitals, (b)  $d_z^2$ , (c)  $d_{x^2-y^2} + d_{xy}$ , (d)  $d_{xz} + d_{yz}$  orbitals. These DOSs were calculated by using the mBJ exchange potential.

#### 4. Electronic structure of LiWN<sub>2</sub> consisting of edge-sharing trigonal prismatic layers

The electronic band structure and the orbital characters for the lowest conduction band in LiWN<sub>2</sub> are shown in Figure S5. Electronic structures of LiWN<sub>2</sub> were calculated by using the GGA-PBE functional. In LiWN<sub>2</sub>, three electronic bands (Bands C, D, and E) cross the Fermi level (0 eV). In Bands C and D, the predominant orbital characters are W 5d<sub>x<sup>2</sup>-y<sup>2</sup></sub> + 5d<sub>xy</sub> near the Fermi level and near the K- and H-points, and W 5d<sub>z<sup>2</sup></sub> below the Fermi level and near the  $\Gamma$ - and A-points. In Band E, N 2p orbital character predominates. In Bands A and B, the dominant orbital characters are W 5d<sub>z<sup>2</sup></sub> near the K- and H-points, and W 5d<sub>x<sup>2</sup>-y<sup>2</sup></sub> + 5d<sub>xy</sub> in the  $\Gamma$ -A direction and near the K-point. As shown in Figure S6, large contributions from W 5d<sub>z<sup>2</sup></sub> and 5d<sub>x<sup>2</sup>-y<sup>2</sup></sub> + 5d<sub>xy</sub> orbitals are separately present near the Fermi level (0 eV) and at about 4 eV, corresponding to locations of Bands C and D near the Fermi level and of Bands A and B at about 5 eV. The electronic structure also contains some N 2p orbital character near the Fermi level and at about 4 eV (Figure S6). Hybridized orbital characters combining W 5d<sub>z<sup>2</sup></sub>, 5d<sub>x<sup>2</sup>-y<sup>2</sup></sub> + 5d<sub>xy</sub> with N 2p are present in the electronic bands near the Fermi level (0 eV) and at about 4 eV.

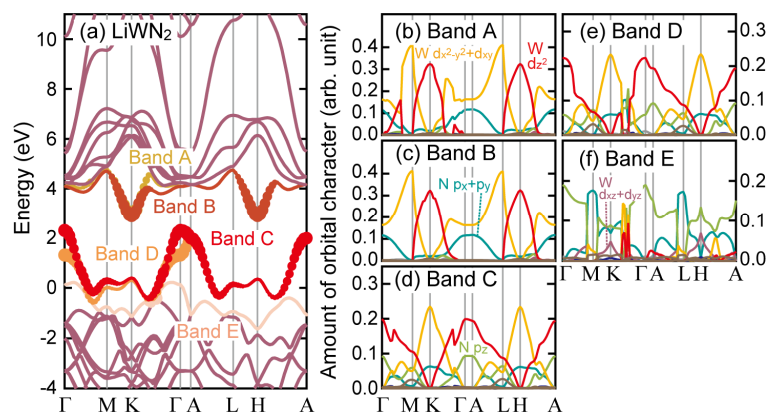

Figure S5. (a) Electronic band structure and (b–f) orbital characters of electronic bands (Bands A–E) near the Fermi level in LiWN<sub>2</sub>. The amounts of W 5d<sub>z<sup>2</sup></sub> orbital characters are shown in the electronic band structures by the widths of the line (Bands A–E near the Fermi level). All s orbitals, p orbitals (p<sub>z</sub>, p<sub>x</sub> + p<sub>y</sub> for W, p<sub>x</sub>, p<sub>y</sub>, p<sub>z</sub> for N), and d orbitals (d<sub>z<sup>2</sup></sub>, d<sub>x<sup>2</sup>-y<sup>2</sup></sub> + d<sub>xy</sub>, d<sub>xz</sub> + d<sub>yz</sub> for W) are plotted in Figures S5b–S5f. The electronic band structure was calculated by using the GGA-PBE functional.

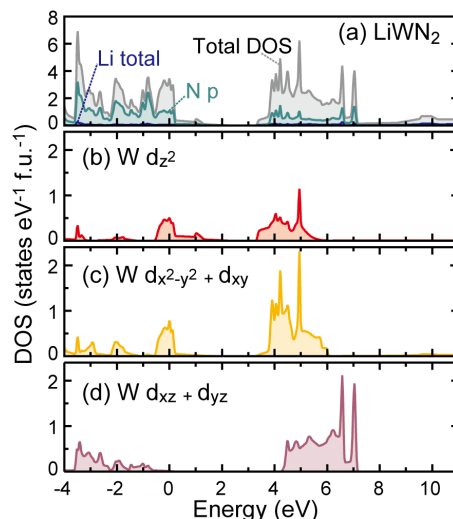

**Figure S6.** Total and partial density of states (DOS) of d orbitals in LiWN<sub>2</sub>. (a) Total DOS and partial DOS of Li and N 2p orbitals, (b)  $d_z^2$ , (c)  $d_{x^2-y^2} + d_{xy}$ , (d)  $d_{xz} + d_{yz}$ . The DOSs were calculated by using the GGA-PBE functional.

## 5. Supplementary references

- (S1) P. Blaha, K. Schwarz, G. Madsen, D. Kvasnicka, and J. Luitz, *Wien2k: An Augmented Plane Wave Plus Local Orbitals Program for Calculating Crystal Properties*; TU Vienna: Vienna, Austria, 2001.
- (S2) J. P. Perdew, K. Burke, and M. Ernzerhof, *Phys. Rev. Lett.* 1996, **77**, 3865–3868.
- (S3) J. P. Perdew, K. Burke, and M. Ernzerhof, *Phys. Rev. Lett.* 1997, **78**, 1396.
- (S4) F. Tran, P. Blaha, *Phys. Rev. Lett.* 2009, **102**, 226401.
- (S5) D. Koller, F. Tran, and P. Blaha, *Phys. Rev. B: Condens. Matter*, 2011, **83**, 195134.
- (S6) J. Akimoto, Y. Gotoh, and Y. Oosawa, *Acta Cryst.* 1994, **C50**, 160–161.
- (S7) J. Huster, *Z. Naturforsch. B*, 1980, **35**, 775.
- (S8) H. Hahn, U. Mutschke, *Z. Anorg. Allg. Chem.* 1956, **288**, 269–278.
- (S9) D. H. Gregory, M. G. Barker, P. P. Edwards, D. J. Siddons, *Inorg. Chem.* 1996, **35**, 7608–7613.
- (S10) S. H. Elder, L. H. Doerrer, F. J. DiSalvo, J. B. Parise, D. Guyomard, and J. M. Tarascon, *Chem. Mater.* 1992, **4**, 929–937.
- (S11) S. Kaskel, D. Hohlwein, and J. Strähle, *J. Solid State Chem.* 1998, **138**, 154–159.
- (S12) I. Ohkubo and T. Mori, *Inorg. Chem.* 2014, **53**, 8979–8984.
- (S13) I. Ohkubo and T. Mori, *APL Mater.* 2016, **4**, 104808.
